# Supplementary material
Source: publisher site journal article supplement (https://www.dovepress.com/article/250047)
Supplement: Supplementary file 1 [file get_supplementary_file.php]

| **Cell line/**  **STRs** | HONE-11 | HONE-12 | NP4601 | NP4602 |
| --- | --- | --- | --- | --- |
| **Amelogenin** | X | X | X, Y | X, Y |
| **CSF1PO** | 10,11 | 10,11 | 13,14 | 13,14 |
| **D3S1358** | 15,18 | 15,16,18 | 15,16 | 15,16 |
| **D5S818** | 11,12 | 11,12 | 11,12 | 11,12 |
| **D7S820** | 10,12 | 10,12 | 10,11 | 10,11 |
| **D8S1179** | 12 | 12,16 | 13,14 | 13,14 |
| **D13S317** | 10,12 | 10,12 | 9,10 | 9,10 |
| **D16S539** | 9,10,11 | 9,10,11 | 11,12 | 11,12 |
| **D18S51** | 13,16 | 13,16 | 13,21 | 13,21 |
| **D21S11** | 27,30 | 27,30 | 29,32.2 | 29,32.2 |
| **FGA** | 18,21 | 18,21 | 22,25 | 22,25 |
| **Penta D** | 9,12 | 9,12 | - | - |
| **Penta E** | 17,20 | 16,17,20 | - | - |
| **TH01** | 6,9 | 6,7,9 | 7,10 | 7,10 |
| **TPOX** | 8,12 | 8,12 | 9,11 | 9,11 |
| **vWA** | 14,16 | 14,16 | 17,19 | 17,19 |
| **% Match**3 |  | **93.75** |  | **100** |

1 extracted data from ExPASy Bioinformatics Resource Portal, Swiss Institute of Bioinformatics (SIB): HONE-1 (CVCL_8706), NP460 (CVCL_X205)

2 data from cell line used in our laboratory

3 Match analysis was performed using the cellosaurus STR similarity search tool CLASTR 1.4.3 available on ExPASy website <https://web.expasy.org/cellosaurus-str-search/>

**Table S1 Short tandem repeat (STR) profiling data of HONE1 and NP460 for cell line authentication.**
